# Supplementary material
Source: Research Square preprint supplement (doi:10.21203/rs.3.rs-7900994/v1)
Supplement: Supplementary file 1 [file 0c9d52ca65886b6f8f3daaf5.pdf]

*Supplementary Information for*

## **A multi-spectroscopic investigation into the diagenesis of avian polyene pigments: simulated maturation, chemical pathways and palaeontological implications**

Arindam Roy<sup>1,2,\*</sup>, Evan Thomas Saitta<sup>3,\*</sup>, Maya Musa<sup>4,6</sup>, Sumaya Al-Kindi<sup>5,6</sup>, Thomas G. Kaye<sup>7</sup>, and Michael Pittman<sup>8,\*</sup>

<sup>1</sup> School of Geography, Earth and Environmental Sciences, College of Life and Environmental Sciences, University of Birmingham, Birmingham, B15 2TT, U.K.

<sup>2</sup> Department of Earth and Planetary Sciences, The University of Hong Kong, Pokfulam, Hong Kong S.A.R., China.

<sup>3</sup> Negaunee Integrative Research Center, Life Sciences Section, Field Museum of Natural History, Chicago, Illinois 60637, U.S.A.

<sup>4</sup> Department of Earth and Environmental Science (DSTA), University of Pavia, Via Ferrata 9, 27100 Pavia, Italy.

<sup>5</sup> Minerals Development Oman SAOC, Muscat, Oman, Sultanate of Oman.

<sup>6</sup> Gulf Institute of Gemology LLC–GIG, Muscat, Sultanate of Oman

<sup>7</sup> Foundation for Scientific Advancement, Sierra Vista, Arizona 85650, U.S.A.

<sup>8</sup> School of Life Sciences, The Chinese University of Hong Kong, Shatin, New Territories, Hong Kong S.A.R., China.

\*Corresponding author(s)

E-mail: [a.roy.2@bham.ac.uk](mailto:a.roy.2@bham.ac.uk), [evansaitta@gmail.com](mailto:evansaitta@gmail.com), [mpittman@cuhk.edu.hk](mailto:mpittman@cuhk.edu.hk)

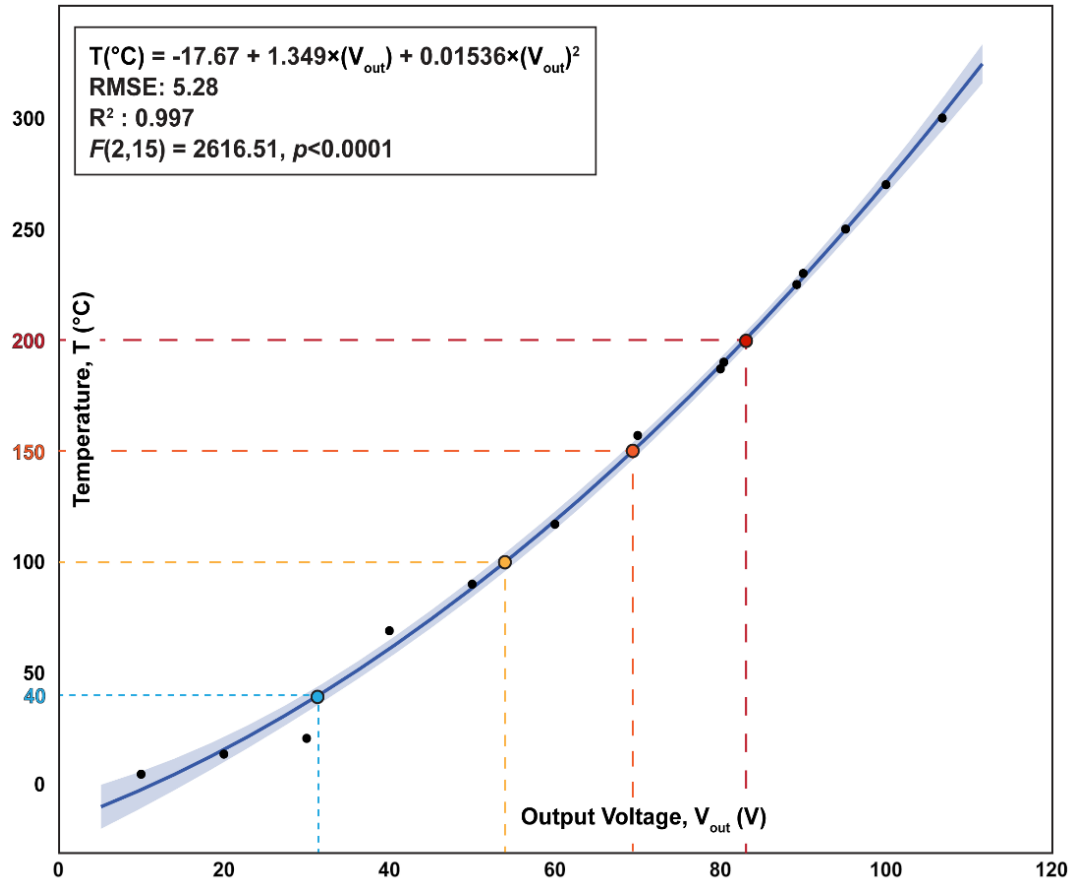

**Fig S1** Calibration of output voltage ( $V_{out}$ ) vs. temperature ( $T$ ) in a pressurised dry run without samples. The output voltages required to achieve the experimental temperatures (40°C, 100°C, 150°C and 200°C) on the maturation setup are calculated by fitting the datapoints to a quadratic equation and extrapolating the values on the  $V_{out}$  axis. Confidence intervals shown in grey and prediction intervals shown in blue.

**Table S1** Output voltage calibrated ( $V_{out}$ , in volts) against temperature ( $T$ , in °C). Extrapolated values indicated in red.

| No. | $V_{out}$ (in V) | $T$ (in °C) |
|-----|------------------|-------------|
| 1   | 10.0             | 4.4         |
| 2   | 20.0             | 13.4        |
| 3   | 30.0             | 20.5        |
| 4   | 31.4             | 40.0        |
| 5   | 40.0             | 69.0        |
| 6   | 50.0             | 90.0        |
| 7   | 54.0             | 100.0       |
| 8   | 60.0             | 117.0       |
| 9   | 69.4             | 150.0       |
| 10  | 70.0             | 157.0       |
| 11  | 80.0             | 187.0       |
| 12  | 80.4             | 190.0       |
| 13  | 83.0             | 200.0       |
| 14  | 89.2             | 225.0       |
| 15  | 90.0             | 230.0       |
| 16  | 95.1             | 250.0       |
| 17  | 100.0            | 270.0       |
| 18  | 106.8            | 300.0       |

**Fig S2** Comparison of Raman spectra (3200-200  $\text{cm}^{-1}$ ) of white (control), orange-pink (carotenoid), yellow (canary xanthophyll A/B), yellow (psittacofulvin), orange (psittacofulvin), red (psittacofulvin) and green (psittacofulvin) feathers across different temperature treatments. Raman bands of interest were characterised using assignments by Lin-Vien, Colthup, Fateley and Grasselli (1), Socrates (2) and Kish (3).

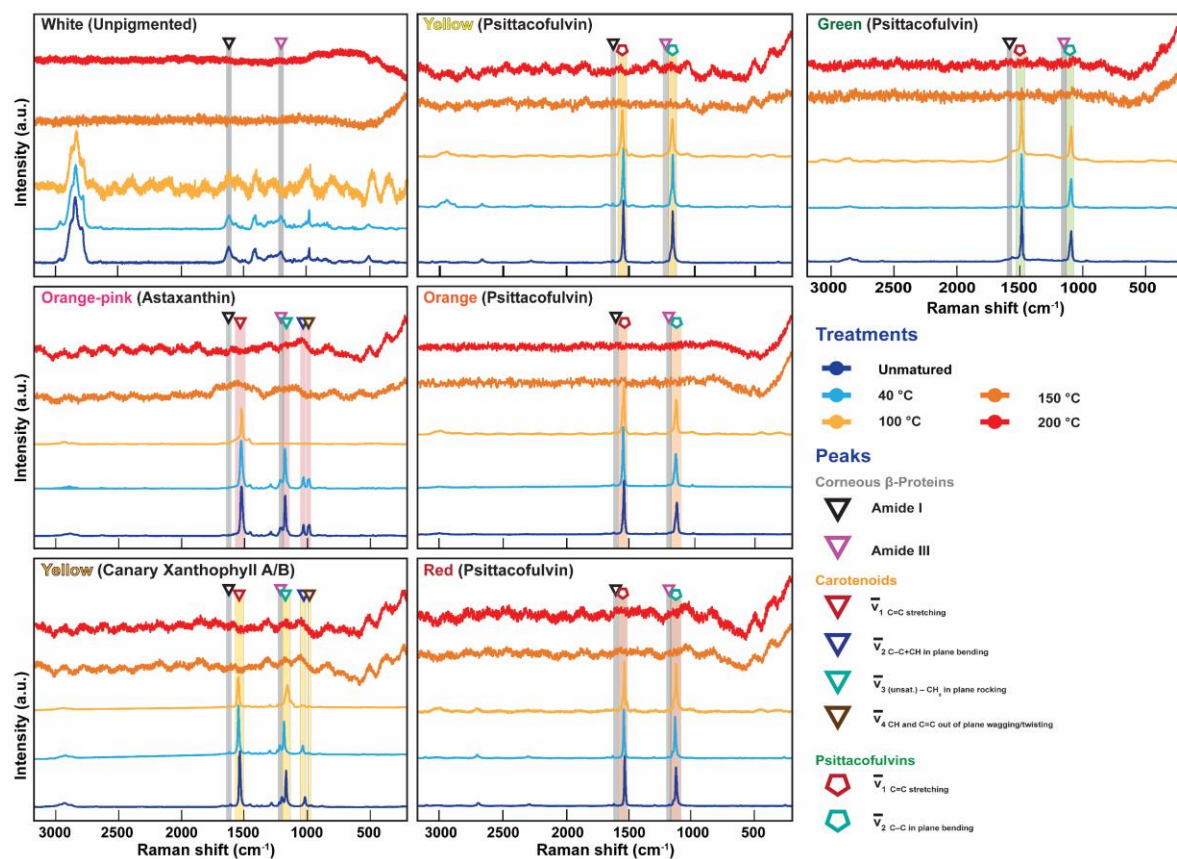

**Table S3** Assignment of characteristic bands to Raman spectra of feathers. Relative band intensities are denoted as follows: vs (very strong); s (strong); m (medium); w (weak); vw (very weak) and vwb (very weak -broad). Diagnostic bands for carotenoids and psittacofulvins are denoted by coloured cells. Raman bands of interest were characterised using assignments by Lin-Vien, Colthup, Fateley and Grasselli (1), Socrates (2) and Kish (3).

| Colour  | Pigment | Raman bands across different temperature treatments |          |          |           |       | Band assignments                                 |
|---------|---------|-----------------------------------------------------|----------|----------|-----------|-------|--------------------------------------------------|
|         |         | Unmat.                                              | 40°C     | 100°C    | 150°C     | 200°C |                                                  |
| White   | -       | 3062 w                                              | 3063 w   | -        | -         | -     | -CH <sub>2</sub> and -CH <sub>3</sub> stretching |
|         |         | 2960 s                                              | 2960 s   | 2960 s   | -         | -     |                                                  |
|         |         | shoulder                                            | shoulder | shoulder | -         | -     |                                                  |
|         |         | 2933 vs                                             | 2934 vs  | 2930 m   | -         | -     |                                                  |
|         |         | 2881 s                                              | 2873 s   | 2873 m   | -         | -     |                                                  |
|         |         | -                                                   | 2770 w   | -        | -         | -     | Amide I                                          |
|         |         | 2726 w                                              | 2725 w   | -        | -         | -     |                                                  |
|         |         | 1666 s                                              | 1667 s   | -        | -         | -     |                                                  |
|         |         | 1617 w                                              | 1614 w   | -        | -         | -     | -CH <sub>2</sub> and -CH <sub>3</sub> bending    |
|         |         | shoulder                                            | shoulder | -        | -         | -     |                                                  |
|         |         | 1446 s                                              | 1448 s   | 1451 w b | -         | -     |                                                  |
|         |         | 1414 w                                              | 1414 w   | -        | -         | -     |                                                  |
|         |         | shoulder                                            | shoulder | -        | -         | -     |                                                  |
| 1318 vw | 1317 vw | -                                                   | -        | -        | Amide III |       |                                                  |
| 1235 m  | 1237 s  | -                                                   | -        | -        |           |       |                                                  |
| -       | 1208 w  | -                                                   | -        | -        |           |       |                                                  |

|                 |             |                         |                              |                    |   |   |                                                                               |
|-----------------|-------------|-------------------------|------------------------------|--------------------|---|---|-------------------------------------------------------------------------------|
|                 |             | –                       | 1156 vw                      | –                  | – | – |                                                                               |
|                 |             | 1128 vw                 | 1128 vw                      | –                  | – | – |                                                                               |
|                 |             | 1029 vw b               | 1031vw                       | –                  | – | – |                                                                               |
|                 |             | 1003 m                  | 1003 m                       | 1003 m             | – | – | $\bar{\nu}$ (Unsat.)–CH <sub>3</sub> in plane rocking                         |
|                 |             | 934 vw                  | 934 vw                       | –                  | – | – |                                                                               |
|                 |             | –                       | 885 vw                       | –                  | – | – |                                                                               |
|                 |             | 867 vwb                 | –                            | –                  | – | – |                                                                               |
|                 |             | –                       | 853 vw                       | –                  | – | – |                                                                               |
|                 |             | –                       | 829 vw                       | –                  | – | – |                                                                               |
|                 |             | –                       | 757 vw b                     | –                  | – | – |                                                                               |
|                 |             | 509 w                   | 507 w b                      | –                  | – | – | S–S bridges                                                                   |
| Orange–<br>Pink | Astaxanthin | 3062 w b                | 3064 w b                     | –                  | – | – |                                                                               |
|                 |             | 2980 w<br>shoulder      | 2976 w<br>shoulder           | 2961 m<br>shoulder | – | – | –CH <sub>2</sub> and –CH <sub>3</sub> stretching                              |
|                 |             | 2932–2934<br>w          | 2932–<br>2934 m              | 2930 m             | – | – |                                                                               |
|                 |             | 2875–2880<br>w shoulder | 2874–<br>2878 w<br>shoulder  | 2873 m             | – | – |                                                                               |
|                 |             | 2875–2880<br>w shoulder | 2662–<br>2673 w b            | –                  | – | – |                                                                               |
|                 |             | 2659–2671<br>w          | 2662–<br>2673 w b            | –                  | – | – |                                                                               |
|                 |             | –                       | 2523 vw                      | –                  | – | – |                                                                               |
|                 |             | 2514 vw                 | –                            | –                  | – | – |                                                                               |
|                 |             | 2473 vw                 | 2475 vw                      | –                  | – | – |                                                                               |
|                 |             | 2308–2311<br>vw         | 2308–<br>2311 vw<br>shoulder | –                  | – | – |                                                                               |
|                 |             | 2161–2163<br>vw         | 2159–<br>2164 vw             | –                  | – | – |                                                                               |
|                 |             | 2117 vw                 | 2114 vw<br>b                 | –                  | – | – |                                                                               |
|                 |             | 1666 w                  | –                            | –                  | – | – | Amide I                                                                       |
|                 |             | 1594 vw                 | 1594 vw                      | –                  | – | – | –                                                                             |
|                 |             | 1577 vw                 | 1575 vw                      | –                  | – | – | –                                                                             |
|                 |             | 1511–1517<br>vs         | 1514–<br>1518 vs             | 1517 vw<br>b       | – | – | $\bar{\nu}_3$ C=C stretching modes<br>of the polyene chain<br>?N–heterocycles |
|                 |             | 1445 m                  | 1445 m                       | 1450 wb            | – | – |                                                                               |
|                 |             | 1392 w                  | 1392 w                       | –                  | – | – |                                                                               |
|                 |             | 1355 w                  | 1355 w                       | –                  | – | – |                                                                               |
|                 |             | 1300 w b                | 1300 w b                     | –                  | – | – |                                                                               |
|                 |             | –                       | 1292 vw                      | –                  | – | – |                                                                               |
|                 |             | 1269–1270<br>m          | 1275 m                       | –                  | – | – | Amide III                                                                     |
|                 |             | 1198 s<br>shoulder      | 1192–<br>1196 s<br>shoulder  | –                  | – | – |                                                                               |
|                 |             | 1157 vs                 | 1157 vs                      | –                  | – | – | $\bar{\nu}_2$ C–C + CH in plane<br>bending                                    |
|                 |             | 1006 s                  | 1006 s                       | –                  | – | – | $\bar{\nu}_3$ (Unsat.)–CH <sub>3</sub> in plane<br>rocking                    |
|                 |             | 961 m                   | 957–967<br>m<br>doublet      | –                  | – | – | $\bar{\nu}_4$ CH and C=C out-of-<br>plane wagging and<br>twisting.            |
|                 |             | 885 vw                  | 885 vw                       | –                  | – | – |                                                                               |
|                 |             | 825 vw                  | 825 vw                       | –                  | – | – |                                                                               |

|             |                        |                   |                   |                  |   |   |                                                            |
|-------------|------------------------|-------------------|-------------------|------------------|---|---|------------------------------------------------------------|
|             |                        | 528 vw            | 528 vw            | –                | – | – |                                                            |
|             |                        | 507 vw            | 506 vw            | –                | – | – | S–S bridges                                                |
|             |                        | 432 vw            | 432 vw            | –                | – | – |                                                            |
| Pale Yellow | Canary xanthophyll A/B | 3063 w b          | 3051–3060 wm b    | 3060 vw b        | – | – | –CH <sub>2</sub> and –CH <sub>3</sub> stretching           |
|             |                        | 2980 w shoulder   | 2970 w shoulder   | 2970 w shoulder  | – | – |                                                            |
|             |                        | 2934 w            | 2932–2936 m       | 2932–2936 m      | – | – |                                                            |
|             |                        | 2881 w shoulder   | 2876 w shoulder   | 2876 w shoulder  | – | – |                                                            |
|             |                        | 2683 vw           | 2679–2683 vw      | –                | – | – |                                                            |
|             |                        | 2535 vw           | –                 | –                | – | – |                                                            |
|             |                        | 2314 vw           | 2314 vw           | –                | – | – |                                                            |
|             |                        | 1668 w b          | –                 | 1664 vw b        | – | – | Amide I                                                    |
|             |                        | 1603 w            | 1603 w            | 1603 w           | – | – |                                                            |
|             |                        | 1583 vw           | 1583 vs           | –                | – | – |                                                            |
|             |                        | –                 | –                 | 1548 s           | – | – |                                                            |
|             |                        | –                 | –                 | 1538 vs          | – | – |                                                            |
|             |                        | 1528 vs           | 1528 vs           | –                | – | – | $\bar{\nu}_1$ C=C stretching modes of the polyene chain    |
|             |                        | –                 | –                 | 1503 s           | – | – |                                                            |
|             |                        | 1446 w            | 1446 w            | 1446 v wb        | – | – | ?N–heterocycles                                            |
|             |                        | 1390 w            | 1390 w            | –                | – | – |                                                            |
|             |                        | 1354 w            | –                 | –                | – | – |                                                            |
|             |                        | –                 | –                 | 1295 vw          | – | – |                                                            |
|             |                        | 1273 m            | 1273 m            | –                | – | – | Amide III                                                  |
|             |                        | 1212 m            | 1212 m            | –                | – | – |                                                            |
|             |                        | 1191 s            | 1190 s            | –                | – | – |                                                            |
|             |                        | 1158 vs           | 1158 vs           | –                | – | – | $\bar{\nu}_2$ C–C + CH in plane bending                    |
|             |                        | –                 | –                 | 1151 s shoulder  | – | – |                                                            |
|             |                        | –                 | –                 | 1139–1140 vs     | – | – |                                                            |
|             |                        | –                 | –                 | 1115 s shoulder  | – | – |                                                            |
|             |                        | 1006 s            | 1006 s            | 1006 vw          | – | – | $\bar{\nu}_3$ (Unsat.)–CH <sub>3</sub> in plane rocking    |
|             |                        | 966–951 w doublet | 967–951 w doublet | –                | – | – | $\bar{\nu}_4$ CH and C=C out-of-plane wagging and twisting |
|             |                        | 870 vw            | 869 vw            | –                | – | – |                                                            |
|             |                        | 515 vw b          | 520 vw b          | –                | – | – | S–S bridges                                                |
| Yellow      | Psittacofulvin         | 3066 vw           | 3074–3062 vw b    | –                | – | – |                                                            |
|             |                        | 2980 w shoulder   | 2970 w shoulder   | 2970 vw shoulder | – | – | –CH <sub>2</sub> and –CH <sub>3</sub> stretching           |
|             |                        | 2937 w            | 2934–2936 m       | 2934–2936 w      | – | – |                                                            |

|        |                |                    |                             |                               |   |   |  |                                                            |
|--------|----------------|--------------------|-----------------------------|-------------------------------|---|---|--|------------------------------------------------------------|
|        |                | 2876 w<br>shoulder | 2875–<br>2880 w<br>shoulder | –                             | – | – |  |                                                            |
|        |                | 2674 vw            | 2670 vw<br>b                | –                             | – | – |  |                                                            |
|        |                | 2272 vw            | 2276 vw<br>b                | –                             | – | – |  |                                                            |
|        |                | 1675 vw b          | 1668–<br>1670<br>vw–m b     | –                             | – | – |  | Amide I                                                    |
|        |                | 1616 w b           | 1614–<br>1620 vw<br>b       | 1614–<br>1620 vw<br>b         | – | – |  |                                                            |
|        |                | –                  | 1564 s<br>1548 vs           | –<br>1548 w–<br>s<br>shoulder | – | – |  |                                                            |
|        |                | 1539 vs            | 1539 s–<br>vs               | 1538 w–<br>vs                 | – | – |  | $\bar{\nu}_1$ C=C stretching modes<br>of the polyene chain |
|        |                | –                  | 1502 s                      | 1502 w                        | – | – |  |                                                            |
|        |                | –                  | 1449<br>vw–w                | –                             | – | – |  |                                                            |
|        |                | 1296 vw            | 1295<br>vw–w                | 1295 w                        | – | – |  | Amide III                                                  |
|        |                | 1196 w<br>shoulder | 1196 w<br>shoulder          | –                             | – | – |  |                                                            |
|        |                | –                  | 1175 vw                     | –                             | – | – |  |                                                            |
|        |                | –                  | 1152 vs                     | 1149 m<br>shoulder            | – | – |  |                                                            |
|        |                | –                  | 1140 vs                     | –                             | – | – |  |                                                            |
|        |                | 1139 vs            | 1138 vs                     | 1137 vs                       | – | – |  | $\bar{\nu}_2$ C–C                                          |
|        |                | –                  | 1135 vs                     | –                             | – | – |  |                                                            |
|        |                | –                  | 1115<br>vw–vs               | 1120 m<br>shoulder            | – | – |  |                                                            |
|        |                | 1017 w             | 1015 vw                     | 1015 vw                       | – | – |  |                                                            |
|        |                | –                  | 1003 m                      | 1003 vw                       | – | – |  |                                                            |
|        |                | –                  | –                           | –                             | – | – |  |                                                            |
|        |                | 559 vw b           | –                           | –                             | – | – |  |                                                            |
|        |                | 293 w              | –                           | –                             | – | – |  |                                                            |
| Orange | Psittacofulvin | 3050 vw            | 3050 vw                     | –                             | – | – |  |                                                            |
|        |                | –                  | 2970 w<br>shoulder          | 2970 w<br>shoulder            | – | – |  | –CH <sub>2</sub> and –CH <sub>3</sub> stretching           |
|        |                | –                  | 2934 m                      | 2932–<br>2936 m               | – | – |  |                                                            |
|        |                | –                  | 2874 w<br>shoulder          | 2876 w<br>shoulder            | – | – |  |                                                            |
|        |                | 2651 m             | 2654 m                      | –                             | – | – |  |                                                            |
|        |                | 2264 w             | 2261–<br>2268 w–<br>m       | –                             | – | – |  |                                                            |
|        |                | –                  | 1654–<br>1660 w b           | –                             | – | – |  | Amide I                                                    |
|        |                | 1611 w             | 1611 w                      | 1615 w                        | – | – |  |                                                            |
|        |                | –                  | 1563 vw<br>shoulder         | 1563 m<br>shoulder            | – | – |  |                                                            |
|        |                | –                  | 1538 vs                     | 1536–<br>1538 vs              | – | – |  |                                                            |

|       |                |           |          |          |   |  |                                                         |
|-------|----------------|-----------|----------|----------|---|--|---------------------------------------------------------|
|       |                |           | 1531 vs  | –        | – |  |                                                         |
|       |                | 1527 vs   | 1528 vs  | –        | – |  | $\bar{\nu}_1$ C=C stretching modes of the polyene chain |
|       |                | –         | –        | 1503 m–s | – |  |                                                         |
|       |                | –         | 1450 vw  | 1450 w b | – |  |                                                         |
|       |                | 1298 vw   | 1296 vw  | 1296 vw  | – |  | Amide III                                               |
|       |                | –         | 1150 s   | 1150 s   | – |  |                                                         |
|       |                |           | shoulder | shoulder |   |  |                                                         |
|       |                | 1134 vs   | 1134–    | 1134–    | – |  | $\bar{\nu}_2$ C–C                                       |
|       |                |           | 1135 vs  | 1137 vs  | – |  |                                                         |
|       |                | –         | –        | 1115 s   | – |  |                                                         |
|       |                |           |          | shoulder |   |  |                                                         |
|       |                | –         | –        | 1015 vw  | – |  |                                                         |
|       |                | –         | 1003 vw  | –        | – |  |                                                         |
|       |                | –         | 294 vw   | –        | – |  |                                                         |
| Red   | Psittacofulvin | 3046 w    | 3049–    | 3054 w   | – |  |                                                         |
|       |                |           | 3054 w   |          |   |  |                                                         |
|       |                | –         | –        | 2935 w b | – |  | –CH <sub>2</sub> and –CH <sub>3</sub> stretching        |
|       |                | –         | –        | 2874 vw  | – |  |                                                         |
|       |                |           |          | b        |   |  |                                                         |
|       |                | 2648 m    | 2652–    | 2652–    | – |  |                                                         |
|       |                |           | 2657 m   | 2657 m   |   |  |                                                         |
|       |                | 2260 w    | 2263 w   | 2268 w   | – |  |                                                         |
|       |                | 1647 vw b | 1650 vw  | 1650 vw  | – |  |                                                         |
|       |                |           | b        | b        |   |  |                                                         |
|       |                | 1611 w    | 1611 w   | 1611 w   | – |  | Amide I                                                 |
|       |                | 1527 vs   | 1527–    | 1527–    | – |  | $\bar{\nu}_1$ C=C stretching modes of the polyene chain |
|       |                |           | 1528 vs  | 1528 vs  | – |  |                                                         |
|       |                | –         | 1519 s   | 1519 w   | – |  |                                                         |
|       |                |           | shoulder | shoulder |   |  |                                                         |
|       |                |           | –        | 1504 m   | – |  |                                                         |
|       |                | 1298 vw   | 1185 vw  | 1295 vw  | – |  | Amide III                                               |
|       |                | 1185 vw   | 1152 m   | 1185 vw  | – |  |                                                         |
|       |                |           | shoulder |          |   |  |                                                         |
|       |                | 1152 m    | 1150 m   | 1150 m   | – |  |                                                         |
|       |                | shoulder  | shoulder | shoulder |   |  |                                                         |
|       |                | 1133 vs   | 1133 vs  | 1133 vs  | – |  | $\bar{\nu}_2$ C–C                                       |
|       |                | –         | 1120 m   | –        | – |  |                                                         |
|       |                |           | shoulder |          |   |  |                                                         |
|       |                | –         | –        | 1030 vw  | – |  |                                                         |
|       |                |           |          | b        |   |  |                                                         |
|       |                | –         | –        | 1003 vw  | – |  |                                                         |
|       |                | 634 vw    | 634 vw   | –        | – |  |                                                         |
|       |                | 294 w     | 294 vw   | 294 vw   | – |  |                                                         |
| Green | Psittacofulvin | 3067 w b  | 3074 w b | 3070 w b | – |  |                                                         |
|       |                | 2980 w    | 2980 vw  | –        | – |  | CH <sub>2</sub> and –CH <sub>3</sub> stretching         |
|       |                | shoulder  | shoulder |          |   |  |                                                         |
|       |                | 2932 m    | 2932–    | 2932–    | – |  |                                                         |
|       |                |           | 2938 w   | 2938 w   |   |  |                                                         |
|       |                | 2872 w    | 2872–    | 2872–    | – |  |                                                         |
|       |                | shoulder  | 2877 vw  | 2877 vw  | – |  |                                                         |
|       |                |           | shoulder | shoulder |   |  |                                                         |
|       |                | –         | 2670–    | 2668 w   | – |  |                                                         |
|       |                |           | 2672 w   |          |   |  |                                                         |
|       |                | 2272 vw   | –        | –        | – |  |                                                         |
|       |                | 1667 vw   | –        | –        | – |  |                                                         |

|           |                  |                    |   |   |  |                                                            |
|-----------|------------------|--------------------|---|---|--|------------------------------------------------------------|
| 1615 vw   | 1615 vw          | 1610 m             | - | - |  | Amide I                                                    |
| -         | -                | 1550 w<br>shoulder | - | - |  |                                                            |
| 1539 vs   | 1537-<br>1539 vs | 1538 vs            | - | - |  | $\bar{\nu}_1$ C=C stretching modes<br>of the polyene chain |
|           | 1503 vs          | 1503 w             | - | - |  |                                                            |
| 1447 vw b |                  |                    |   |   |  | Amide III                                                  |
| 1297 vw   | 1295 vw<br>m     | 1295 w             | - | - |  |                                                            |
| 1198 vw   | 1195 vw          | 1195 vw            | - | - |  |                                                            |
| -         | -                | 1150 w<br>shoulder | - | - |  | $\bar{\nu}_2$ C-C                                          |
| 1139 vs   | 1135-<br>1139 vs | 1136-<br>1138 vs   | - | - |  |                                                            |
| -         | 1115 vs          | 1115 m             | - | - |  |                                                            |
| 1018 vw   | 1018 vw          | 1018 vw            | - | - |  |                                                            |
| 1003 vw   | 1003 vw          | 1003 vw            | - | - |  |                                                            |
| 559 vw b  | -                | -                  | - | - |  |                                                            |

**Fig S3** Comparison of FT-IR-ATR spectra of white (control), orange-pink (carotenoid), yellow (canary xanthophyll A/B), yellow (psittacofulvin), orange (psittacofulvin), red (psittacofulvin), and green (psittacofulvin) feathers across different thermal treatments.

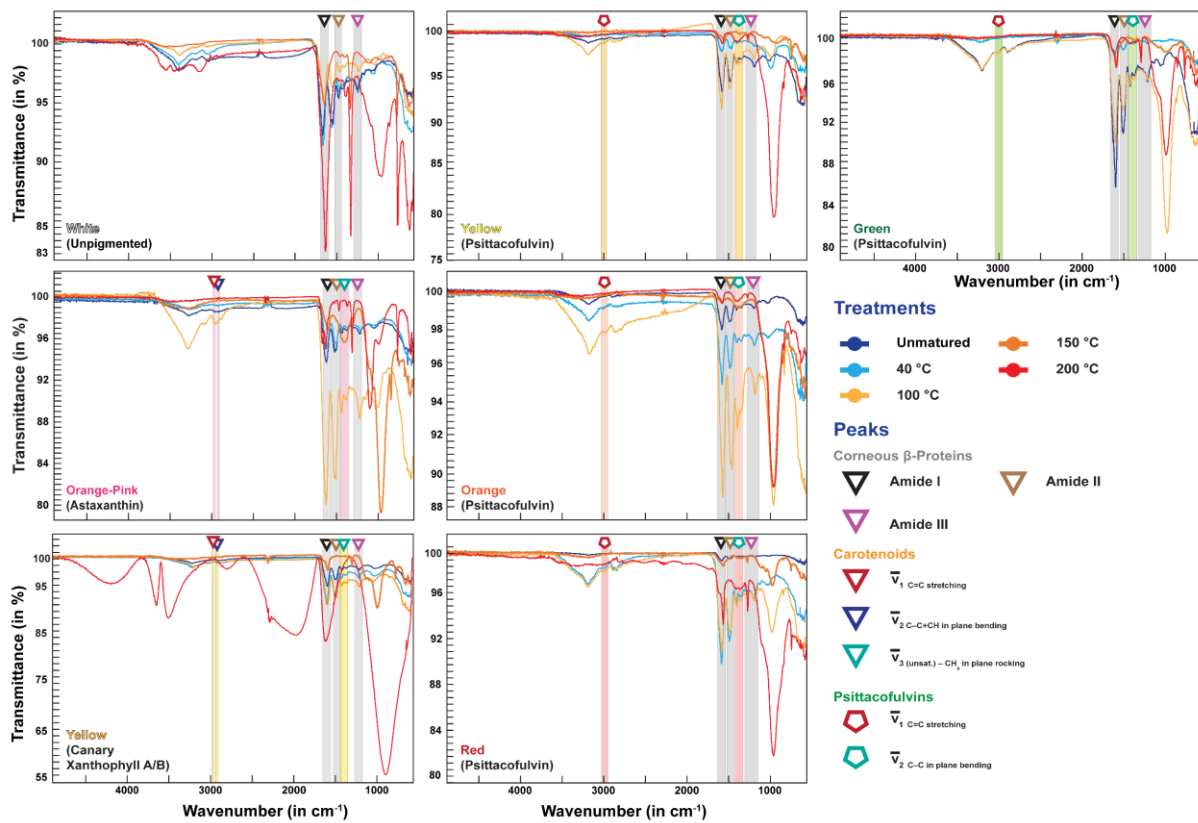

**Table S4** Assignment of characteristic bands to  $\mu$ -ATR/FTIR spectra of feathers. Relative band intensities are denoted as follows: vs (very strong); s (strong); m (medium); w (weak); vw (very weak) and vwb (very weak -broad). FTIR bands of interest were located and identified as per manuals by Lin-Vien, Colthup, Fateley and Grasselli (1) and Socrates (2).

| Colour | Pigment | FT-IR bands across different temperature treatments |                 |                 |                                                                        |        | Band assignments                                                       |
|--------|---------|-----------------------------------------------------|-----------------|-----------------|------------------------------------------------------------------------|--------|------------------------------------------------------------------------|
|        |         | Unmat.                                              | 40°C            | 100°C           | 150°C                                                                  | 200°C  |                                                                        |
| White  | -       | -                                                   | -               | -               | 3421m                                                                  | 3393 m |                                                                        |
|        |         | 3266m                                               | 3266 m          | 3268-<br>3272 m | -                                                                      | 3045 m |                                                                        |
|        |         | 2957 w                                              | 2957 w          | 2961 w          | -                                                                      | -      | $\bar{\nu}(\text{CH}_3)$ stretching                                    |
|        |         | 2929 w                                              | 2925 w          | -               | -                                                                      | -      | $\bar{\nu}(\text{CH}_2)$ stretching                                    |
|        |         | -                                                   | -               | 2876 w          | -                                                                      | -      |                                                                        |
|        |         | 1627 s                                              | 1627-<br>1631 s | 1627 s          | -                                                                      | -      | $\bar{\nu}(\text{C}=\text{O})$ Amide I                                 |
|        |         | -                                                   | -               | -               | 1607 s                                                                 | 1603 s |                                                                        |
|        |         | 1532 s                                              | 1532 s          | 1527-<br>1532 s | -                                                                      | -      | $\delta(\text{N}-\text{H}) + \bar{\nu}(\text{C}-\text{N})$<br>Amide II |
|        |         | 1447 m                                              | 1447-<br>1453 m | 1449 m          | -                                                                      | -      | $\delta(\text{C}-\text{H})$ bending                                    |
|        |         | -                                                   | -               | -               | 1424 w                                                                 | -      |                                                                        |
|        |         | 1403 w                                              | 1400 w          | 1410 w          | -                                                                      | -      | $\delta(\text{C}-\text{H})$ bending                                    |
|        |         | -                                                   | -               | -               | 1382 w                                                                 | -      |                                                                        |
| -      | -       | -                                                   | -               | 1371 m          |                                                                        |        |                                                                        |
| -      | -       | -                                                   | -               | 1314 s          |                                                                        |        |                                                                        |
| 1235 m | 1235 m  | 1234 m                                              | 1235 m          | -               | $\bar{\nu}(\text{C}-\text{N}), \delta(\text{N}-\text{H})$<br>Amide III |        |                                                                        |
| 1159 w | 1159 w  | 1159 w                                              | -               | -               |                                                                        |        |                                                                        |
| -      | -       | -                                                   | 1102 w          | -               |                                                                        |        |                                                                        |

|  |  |         |             |             |             |             |                                                            |
|--|--|---------|-------------|-------------|-------------|-------------|------------------------------------------------------------|
|  |  | 1074 vw | 1074 m      | 1073 m      | –           | –           | $\bar{\nu}(\text{Si-O})$ stretching from clay matrix       |
|  |  | –       | –           | –           | 992 vw      | –           |                                                            |
|  |  | –       | –           | –           | –           | 965 s b     |                                                            |
|  |  | –       | –           | –           | 946 vw      | –           |                                                            |
|  |  | –       | –           | 932 w       | –           | –           |                                                            |
|  |  | –       | –           | –           | 778 s       | 779 s       |                                                            |
|  |  | –       | –           | –           | –           | 3332–3431 m |                                                            |
|  |  | 3265 m  | 3272 m      | 3270–3279 m | 3269 m      | –           |                                                            |
|  |  | –       | 2961 w      | 2961 w      | –           | –           | $\bar{\nu}(\text{CH}_3)$ stretching                        |
|  |  | 2918 w  | –           | –           | –           | –           | $\bar{\nu}(\text{CH}_2)$ stretching                        |
|  |  | 1634 s  | 1634 s      | 1634 s      | 1623–1633 s | 1640–1686 s | $\bar{\nu}(\text{C=O})$ Amide I                            |
|  |  | 1532 s  | 1532 s      | –           | –           | –           | $\delta(\text{N-H})$ , $\bar{\nu}(\text{C-N})$ Amide II    |
|  |  | –       | –           | 1516 s      | –           | –           |                                                            |
|  |  | 1449 m  | 1449 m      | 1447 m      | –           | –           |                                                            |
|  |  | –       | –           | –           | 1417–1430 m | –           | $\delta(\text{C-H})$ bending                               |
|  |  | 1393 m  | 1393–1396 m | 1389 m      | –           | 1393 m      |                                                            |
|  |  | –       | –           | –           | –           | 1326–1331 s |                                                            |
|  |  | 1237 m  | 1237–1240 m | 1233 m      | –           | –           | $\bar{\nu}(\text{C-N})$ , $\delta(\text{N-H})$ Amide III   |
|  |  | –       | 1159 w      | 1159 w      | –           | –           |                                                            |
|  |  | –       | –           | –           | –           | 1122–1132 s |                                                            |
|  |  | 1074 vw | 1074–1081 m | –           | –           | –           | $\bar{\nu}(\text{Si-O})$ stretching from clay matrix       |
|  |  | –       | –           | 1037 m      | –           | –           |                                                            |
|  |  | –       | –           | –           | 994–976 vs  | 996–1010 m  |                                                            |
|  |  | –       | –           | –           | –           | –           |                                                            |
|  |  | –       | –           | –           | 873 m       | –           |                                                            |
|  |  | –       | –           | –           | –           | 779–789 s   |                                                            |
|  |  | –       | –           | –           | 730–755 w   | –           |                                                            |
|  |  | –       | –           | –           | –           | 607–614 s   |                                                            |
|  |  | –       | –           | –           | –           | 3732 m      |                                                            |
|  |  | –       | –           | –           | –           | 3586 m      |                                                            |
|  |  | –       | –           | –           | –           | 3453 m      |                                                            |
|  |  | 3268 m  | 3268 m      | 3273 m      | –           | –           |                                                            |
|  |  | 2961 w  | 2961 w      | 2964 w      | –           | –           | $\bar{\nu}(\text{CH}_3)$ stretching                        |
|  |  | 2922 w  | –           | 2929 w      | –           | –           | $\bar{\nu}(\text{CH}_2)$ stretching                        |
|  |  | –       | –           | –           | 2346 w      | 2348 m      |                                                            |
|  |  | –       | –           | –           | 1662 s      | –           |                                                            |
|  |  | 1628 vs | 1627 s      | 1627–1630 s | –           | 1614–1619 s | $\bar{\nu}(\text{C=O})$ , Amide I                          |
|  |  | 1532 s  | 1516–1532 s | 1532 s      | –           | –           | $\delta(\text{N-H})$ , $\bar{\nu}(\text{C-N})$ Amide II    |
|  |  | 1453 m  | 1449 m      | 1446 m      | –           | –           |                                                            |
|  |  | 1403 w  | 1407 w      | 1403 w      | –           | –           | $\delta(\text{C-H})$ bending                               |
|  |  | –       | –           | –           | –           | 1315 m      |                                                            |
|  |  | 1237 m  | 1237 m      | 1233 m      | –           | –           | $\bar{\nu}(\text{C-N})$ , $\delta(\text{N-H})$ , Amide III |
|  |  | –       | 1159 m      | –           | –           | –           |                                                            |
|  |  | –       | –           | 1113 m      | –           | –           |                                                            |
|  |  | –       | –           | –           | –           | 1099 w      |                                                            |
|  |  | 1063 m  | 1049–1060 m | –           | –           | –           | $\bar{\nu}(\text{Si-O})$ stretching from clay matrix       |
|  |  | –       | –           | –           | –           | 1006 s      |                                                            |
|  |  | –       | –           | –           | 914 vs      | –           |                                                            |
|  |  | –       | –           | 876 w       | –           | 872 w       |                                                            |

|        |                |        |             |                    |        |             |                                                                             |
|--------|----------------|--------|-------------|--------------------|--------|-------------|-----------------------------------------------------------------------------|
|        |                |        |             | 1151 s<br>shoulder |        | 779 s       |                                                                             |
|        |                |        |             |                    |        | 3371 m      |                                                                             |
|        |                | 3269 m | 3272 m      | 3276 m             |        |             |                                                                             |
|        |                | –      | –           | –                  | 3326 m |             |                                                                             |
|        |                | –      | 2961 w      | 2961 w             | –      |             | $\bar{\nu}(\text{CH}_3)$ stretching                                         |
|        |                | 1630 s | 1627 s      | 1629 s             | –      | 1616–1630 m | $\bar{\nu}(\text{C}=\text{O})$ , Amide I                                    |
|        |                | –      | –           | –                  | 1614 s | –           |                                                                             |
|        |                | 1513 s | 1516–1627 s | 1531 s             | –      | –           | $\delta(\text{N}-\text{H})$ , $\bar{\nu}(\text{C}-\text{N})$<br>Amide II    |
|        |                | 1446 w | 1446–1449 m | 1449 m             | –      | 1446 m      | $\delta(\text{C}-\text{H})$ bending                                         |
|        |                | –      | –           | –                  | 1424 m | –           |                                                                             |
|        |                | –      | 1396 w      | 1393 w             | –      | –           |                                                                             |
| Yellow | Psittacofulvin | –      | –           | –                  | 1314 s | 1315–1318 m |                                                                             |
|        |                | 1230   | 1230 w      | 1226–1237 m        | –      | –           | $\bar{\nu}(\text{C}-\text{N})$ , $\delta(\text{N}-\text{H})$ ,<br>Amide III |
|        |                | –      | –           | –                  | 1103 s | –           |                                                                             |
|        |                | –      | –           | –                  | –      | 1092 w      |                                                                             |
|        |                | 1043 m | 1036 s      | 1046 m             | –      | –           | $\bar{\nu}(\text{Si}-\text{O})$ stretching<br>from clay matrix              |
|        |                | –      | –           | –                  | –      | 1000–1007 s |                                                                             |
|        |                | –      | –           | –                  | 992 w  | –           |                                                                             |
|        |                | –      | –           | –                  | 918 w  | –           |                                                                             |
|        |                | –      | –           | 872 w              | 876 w  | 876 w       |                                                                             |
|        |                | –      | –           | –                  | –      | 780 m       |                                                                             |
|        |                | –      | –           | –                  | –      | 3418 m      |                                                                             |
|        |                | –      | –           | –                  | 3343 m | –           |                                                                             |
|        |                | 3258 m | 3276 m      | 3264–3272 m        | –      | –           |                                                                             |
|        |                | –      | –           | 2961 w             | –      | –           | $\bar{\nu}(\text{CH}_3)$ stretching                                         |
|        |                | 1630 s | 1630 s      | 1628 s             | –      | –           | $\bar{\nu}(\text{C}=\text{O})$ , Amide I                                    |
|        |                | –      | –           | –                  | 1615 s | 1619 m      |                                                                             |
|        |                | 1534 s | 1531 s      | 1515 s             | –      | –           | $\delta(\text{N}-\text{H})$ , $\bar{\nu}(\text{C}-\text{N})$<br>Amide II    |
|        |                | 1449 m | 1446–1449 m | 1449 m             | –      | –           | $\delta(\text{C}-\text{H})$ bending                                         |
|        |                | –      | –           | –                  | 1428 m | –           |                                                                             |
|        |                | 1393 m | 1389–1396 w | 1393–1410 w        | –      | –           |                                                                             |
| Orange | Psittacofulvin | –      | –           | –                  | –      | 1343 m      |                                                                             |
|        |                | –      | –           | –                  | 1313 s | 1318 m      |                                                                             |
|        |                | 1233 m | 1226–1233 m | 1233 m             | –      | –           | $\bar{\nu}(\text{C}-\text{N})$ , $\delta(\text{N}-\text{H})$ ,<br>Amide III |
|        |                | –      | 1138–1159 w | –                  | –      | –           |                                                                             |
|        |                | –      | –           | –                  | 1099 m | 1099 w      |                                                                             |
|        |                | 1042 m | 1035 s      | –                  | –      | –           | $\bar{\nu}(\text{Si}-\text{O})$ stretching<br>from clay matrix              |
|        |                | –      | –           | 1006 s             | –      | 1001 s      |                                                                             |
|        |                | –      | –           | –                  | 993 m  | –           |                                                                             |
|        |                | –      | –           | –                  | 872 w  | 872 m       |                                                                             |
|        |                | –      | –           | –                  | 779 s  | 780 m       |                                                                             |
|        |                | –      | –           | –                  | 638 s  | –           |                                                                             |
|        |                | –      | –           | –                  | 613 s  | –           |                                                                             |
|        |                | –      | –           | –                  | –      | 3428 m      |                                                                             |
|        |                | 3273 m | 3273 m      | 3273 m             | 3269 m | –           |                                                                             |
|        |                | –      | 2957 w      | 2964 w             | –      | –           | $\bar{\nu}(\text{CH}_3)$ stretching                                         |
| Red    | Psittacofulvin | 2925   | 2922 w      | –                  | –      | –           | $\bar{\nu}(\text{CH}_2)$ stretching                                         |
|        |                | –      | –           | –                  | 2338 m | –           |                                                                             |
|        |                | 1634 s | 1631–1643 s | 1627–1633 s        | –      | –           | $\bar{\nu}(\text{C}=\text{O})$ , Amide I                                    |

|  |        |             |             |                      |             |                                                             |
|--|--------|-------------|-------------|----------------------|-------------|-------------------------------------------------------------|
|  |        |             |             | 1612 s               | 1616 s      |                                                             |
|  | 1538 s | 1534–1538 s |             | –                    | –           | $\delta(\text{N-H})$ , $\bar{\nu}(\text{C-N})$<br>Amide II  |
|  |        |             | 1516 s      | –                    | –           |                                                             |
|  | 1453 m | 1449–1453 m | 1449 m      | –                    | –           | $\delta(\text{C-H})$ bending                                |
|  |        |             |             | –                    | 1436 m      |                                                             |
|  |        |             |             | 1403–1421 w          | –           |                                                             |
|  | 1400 w | 1385–1410 w | 1396 w      | 1400 w               | –           |                                                             |
|  |        |             |             | 1315–1318 w          | 1316 m      |                                                             |
|  | 1237 m | 1237 m      | 1233–1237 m | –                    | –           | $\bar{\nu}(\text{C-N})$ , $\delta(\text{N-H})$<br>Amide III |
|  |        | 1159 w      | –           | –                    | –           |                                                             |
|  | 1070 w | 1015–1070 m | 1013 s      | 1085 m               | –           | $\bar{\nu}(\text{Si-O})$ stretching<br>from clay matrix     |
|  |        |             |             | 993–1004 vs<br>876 m | 979–1001 s  |                                                             |
|  |        | 872 m       |             | 777–780 m            | 873 m       |                                                             |
|  |        |             |             |                      | 780 m       |                                                             |
|  |        |             |             |                      | 3417 m      |                                                             |
|  | 3273 m | 3283 m      | 3279 m      | 3293 m               | –           |                                                             |
|  | 2957 w | –           | 2964 w      | –                    | –           | $\bar{\nu}(\text{CH}_3)$ stretching                         |
|  | 2918 w | –           | –           | –                    | –           | $\bar{\nu}(\text{CH}_2)$ stretching                         |
|  |        | 2338 m      | –           | –                    | –           |                                                             |
|  | 1631 s | 1637 s      | 1627–1631 s | 1611–1633 s          | –           | $\bar{\nu}(\text{C=O})$ , Amide I                           |
|  |        |             |             |                      | 1620–1640 s |                                                             |
|  | 1538 s | 1531 s      | 1532 s      | –                    | –           | $\delta(\text{N-H})$ , $\bar{\nu}(\text{C-N})$<br>Amide II  |
|  | 1450 m | 1453 m      | 1453 m      | –                    | 1445 m      | $\delta(\text{C-H})$ bending                                |
|  |        |             |             | 1421 m               | –           |                                                             |
|  | 1407 w | 1407 w      | 1393 w      | –                    | –           |                                                             |
|  |        |             |             | 1311–1318 m-s        | 1317 m      |                                                             |
|  | 1235 m | 1237 w      | 1233 w      | –                    | –           | $\bar{\nu}(\text{C-N})$ , $\delta(\text{N-H})$<br>Amide III |
|  | 1070 w | –           | –           | –                    | –           | $\bar{\nu}(\text{Si-O})$ stretching<br>from clay matrix     |
|  |        |             |             | 1007–1013 s          | 1006–1011 s |                                                             |
|  |        |             | 992 s       | –                    | –           |                                                             |
|  |        |             | 872 w       | 876 m                | 872 m       |                                                             |
|  |        |             |             | 777–780 m            | 781 m       |                                                             |

## References

1. D. Lin-Vien, N. B. Colthup, W. G. Fateley, J. G. Grasselli, *The handbook of infrared and Raman characteristic frequencies of organic molecules*. (Elsevier, 1991).
2. G. Socrates, *Infrared and Raman characteristic group frequencies: tables and charts*. (John Wiley & Sons, 2004).
3. E. A. Kish, *Biophysical Characterization of Carotenoids and Carotenoid Containing Proteins Using Resonance Raman Spectroscopy*. (2016).
